# Supplementary material for: Turmeric-derived nanovesicles as novel nanobiologics for targeted therapy of ulcerative colitis
Source: PubMed Central journal article supplement (PMC9330521; doi:10.7150/thno.73650), 2022-07-18
Supplement: thnov12p5596s1.pdf [file thnov12p5596s1.pdf]

## Supporting Information

### **Turmeric-derived nanovesicles as novel nanobiologics for targeted therapy of ulcerative colitis**

Caifang Gao<sup>1</sup>, Yangyang Zhou<sup>1</sup>, Zhejie Chen<sup>1</sup>, Hongyi Li<sup>1</sup>, Yaqin Xiao<sup>1</sup>, Wei Hao<sup>1</sup>,  
Ying Zhu<sup>2</sup>, Chi Teng Vong<sup>1</sup>, Mohamed A. Farag<sup>3</sup>, Yitao Wang<sup>1,\*</sup>, Shengpeng Wang<sup>1,\*</sup>

<sup>1</sup> State Key Laboratory of Quality Research in Chinese Medicine, Institute of Chinese Medical Sciences, University of Macau, Avenida da Universidade, Macau, China

<sup>2</sup> Department of Integrative Oncology, Fudan University, Shanghai Cancer Center, Shanghai 200032, China

<sup>3</sup> Pharmacognosy Department, College of Pharmacy, Cairo University, Kasr el Aini St., Cairo 11562, Egypt

#### **\*Correspondence:**

Yitao Wang, Institute of Chinese Medical Sciences, University of Macau, Avenida da Universidade, Taipa, Macau 999078, China. Email: YTWang@um.edu.mo

Shengpeng Wang, Institute of Chinese Medical Sciences, University of Macau, Avenida da Universidade, Taipa, Macau 999078, China. Email: SWang@um.edu.mo

**Figure S1. The lipid profiles and protein composition in TNVs. A.** the lipid profiles of TNVs under positive and negative mode; **B-C.** the GO and KEGG classification of TNVs.

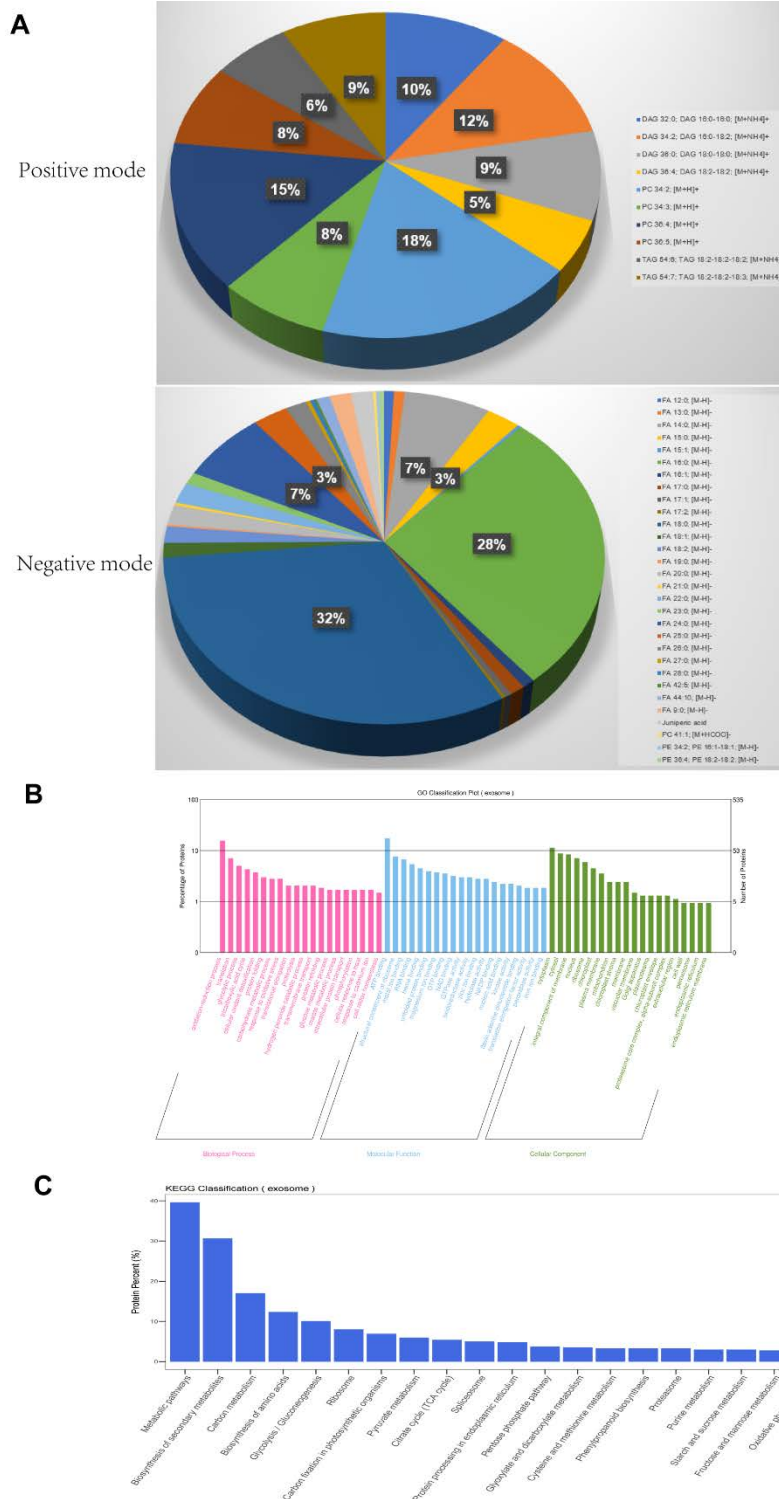

**Figure S2. The size and poly dispersion index (PDI) of TNVs in PBS, stimulated gastric and intestinal fluids.**

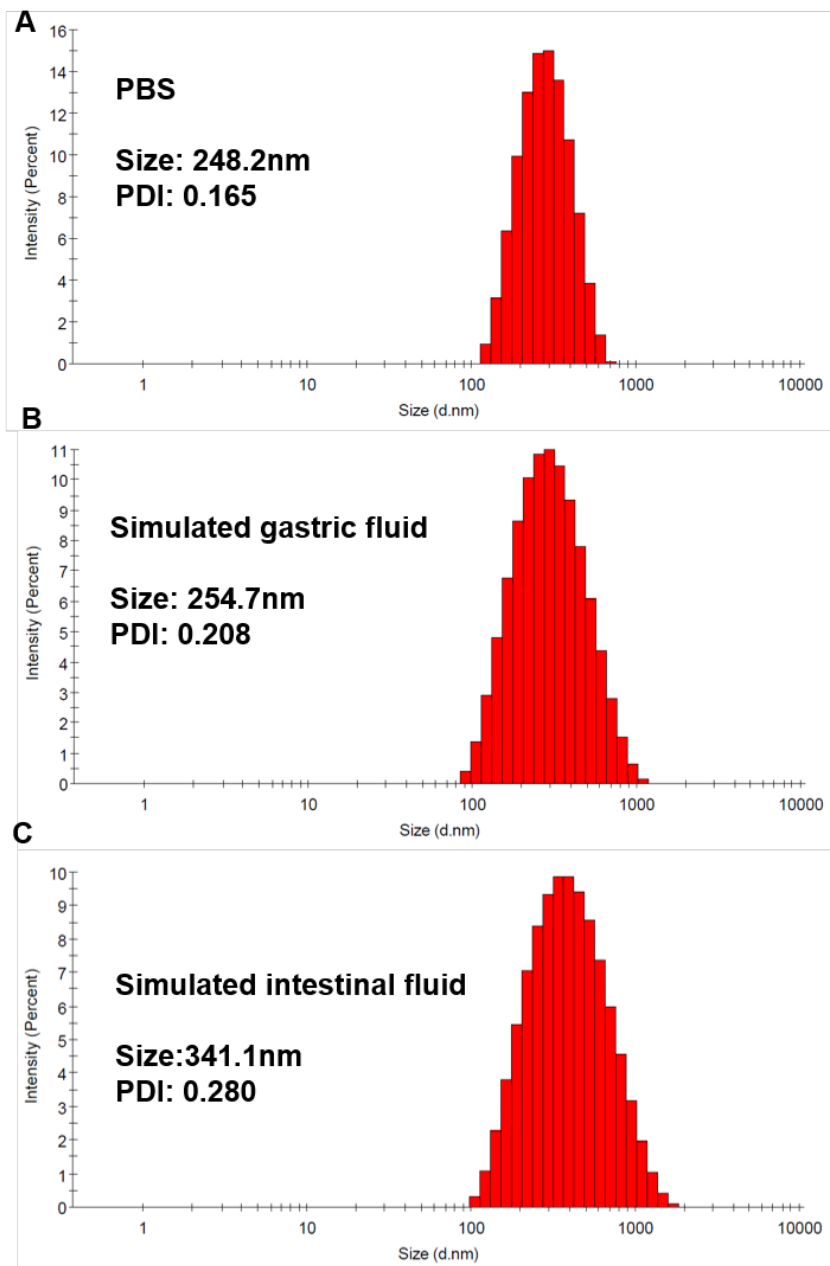

**Figure S3. The cellular uptake of DiO-labeled TNVs in NCM 460 and Raw 264.7 cells for 1, 3, 6 h. A.** the confocal images in both NCM 460 and Raw 264.7 cells; **B-**  
**C.** the flow cytometer result and statistic data in both cells.

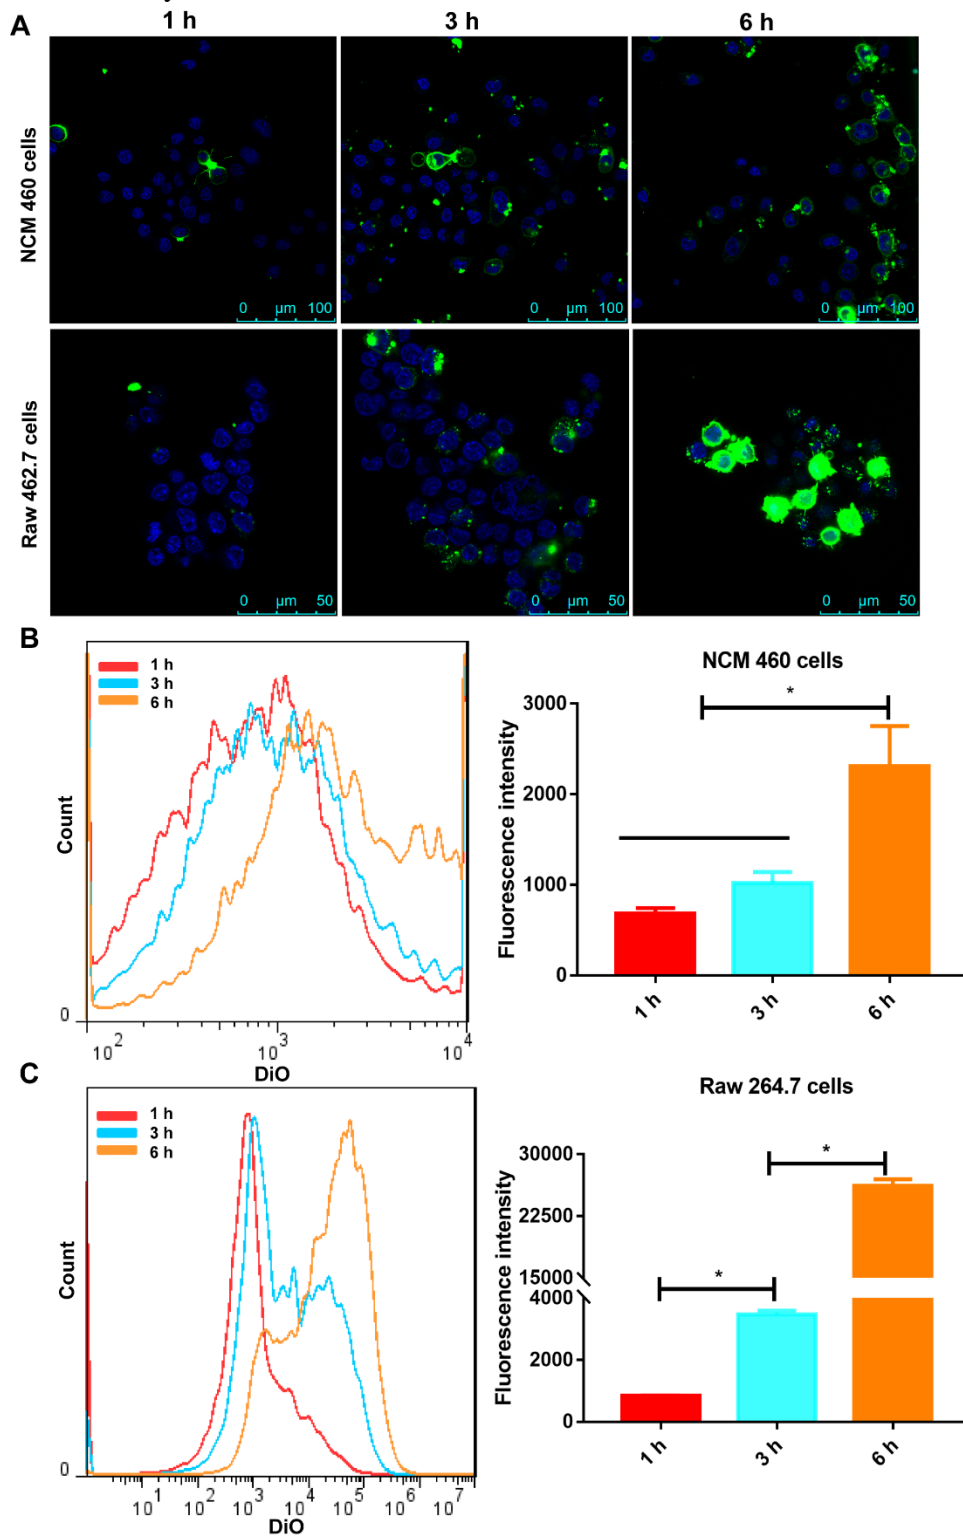

**Figure S4.** The fluorescence picture and fluorescence intensity of TNVs uptake in Raw 264.7 cells with LPS-stimulated condition or not, scale bar: 20 $\mu$ m.

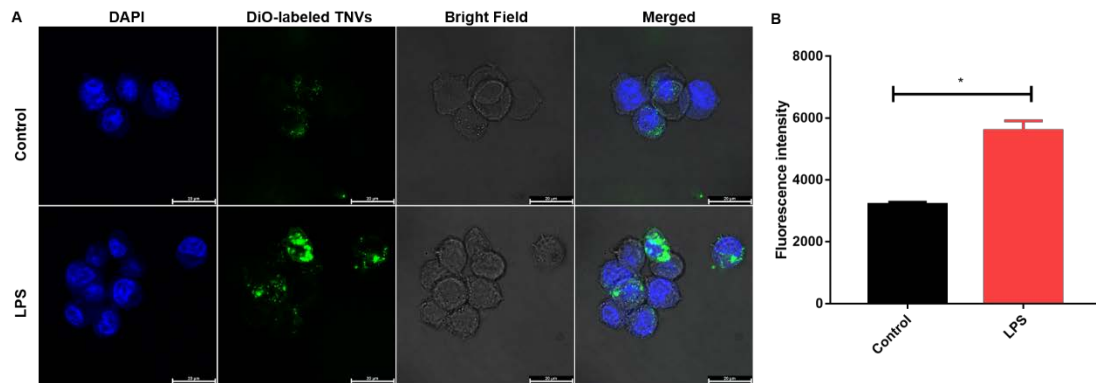

**Figure S5. The *in-vitro* immunostaining of A. E-cadherin (red) and B. ZO-1 (green).** HT-29 cells were cultured for 10 days into monolayer, and then treated with TNVs for 18 h, respectively. Nuclei were stained with Hoechst 33342 (blue).

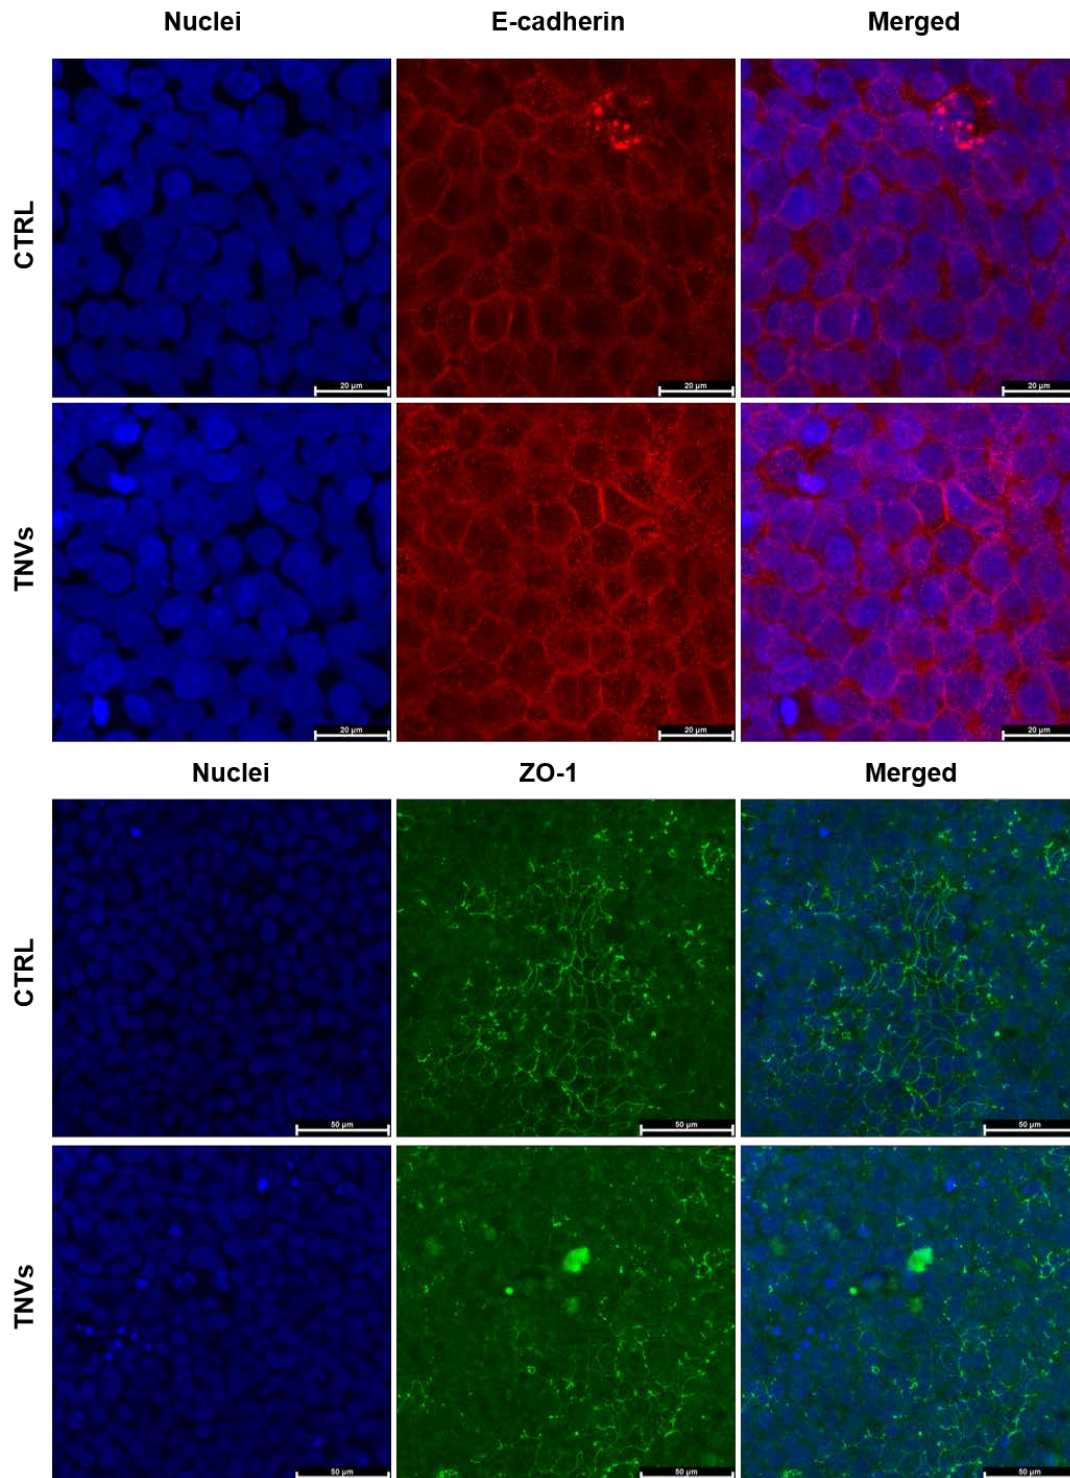



**Figure S6. The *in-vitro* immunostaining of E-cadherin, ZO-1 and Occludin.** Colons from acute colitis mice undergoing different treatment. Nuclei were stained with Hoechst 33342 (blue).

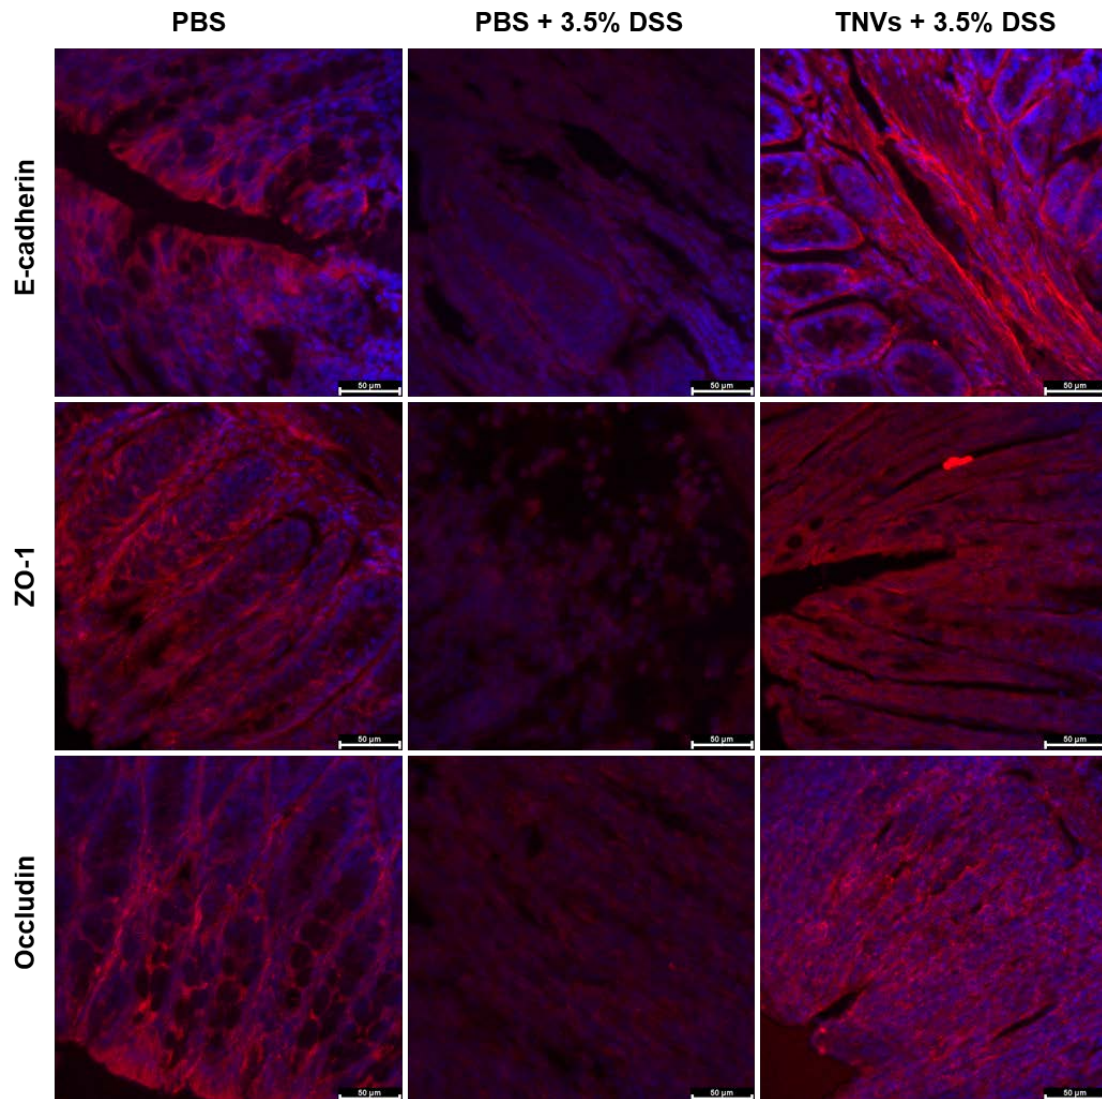

**Figure S7. Colon RNA sequence and DEG from different treatment group. A.** Heatmap showing the gene expression correlation of all sequenced samples; **B.** Bar plot showing the numbers of up- and downregulated DEG in the 3 groups; **C. E.** the volcano of CTRL vs. DSS and DSS vs TNVs; **D. F.** the KEGG enrichment analysis of CTRL vs. DSS and DSS vs TNVs.

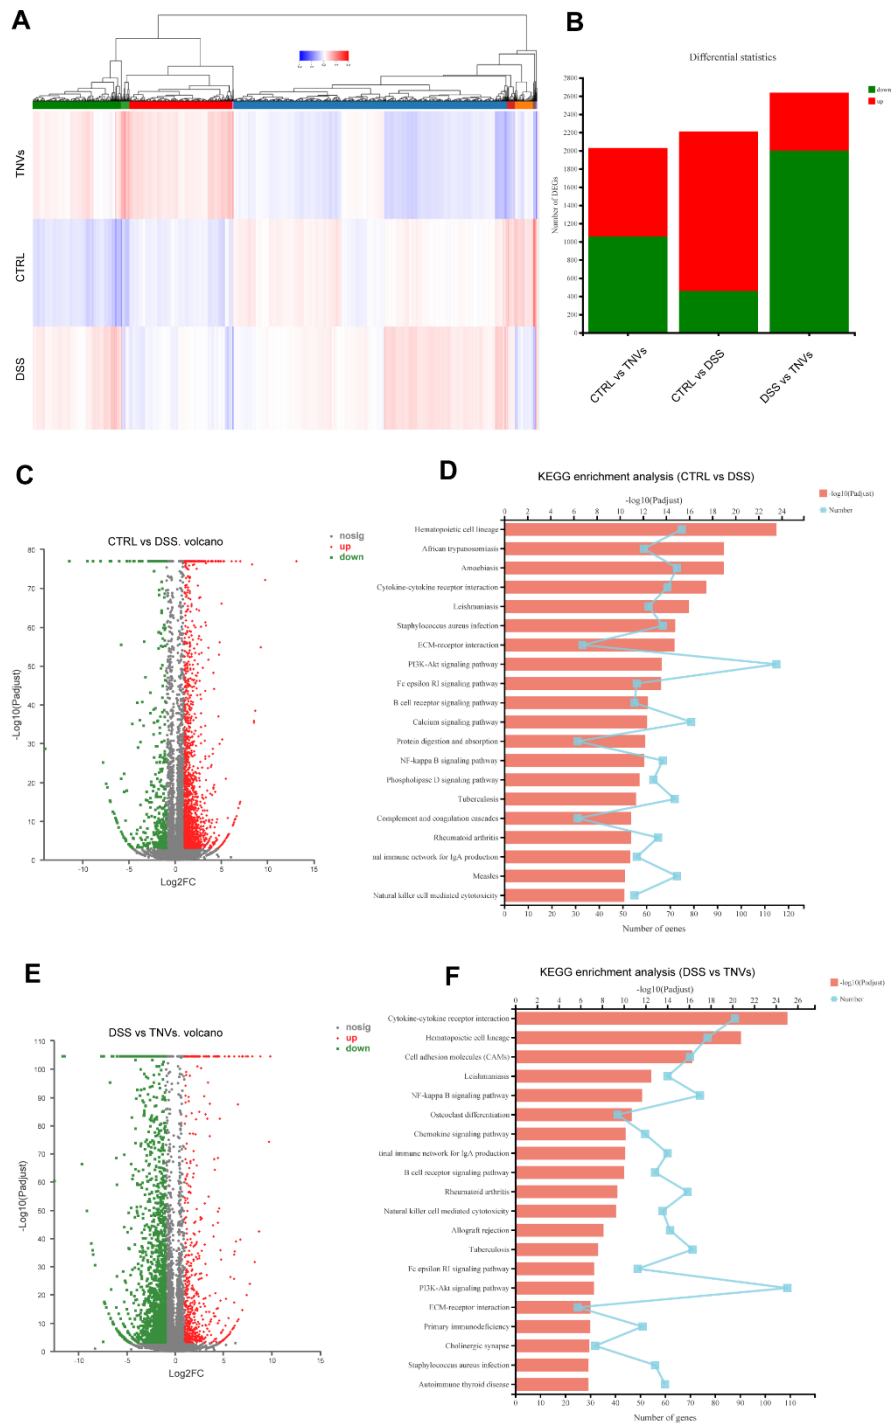



**Figure S8. The concentration of serum biochemical factors.** Alanine aminotransferase (ALT), aspartate aminotransferase (AST), blood urea nitrogen (BUN), creatinine (CREA) in the serum of chronic colitis mice experienced from different treatment, n = 5.

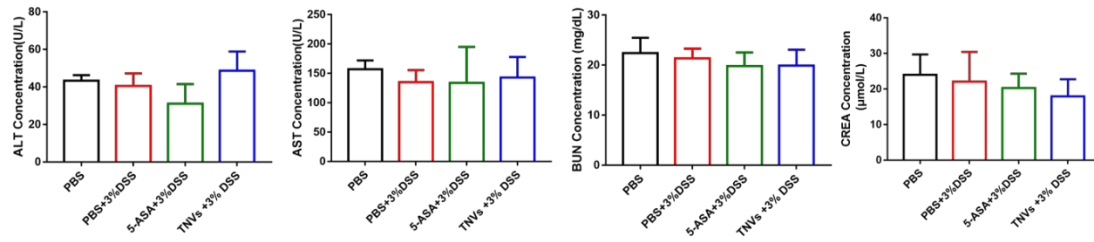

**Table S1. The size diameter, Polydispersity index and Zeta potential of TNVs from three different bands.**

| Samples     | Size diameter (nm) | Polydispersity index | Zeta potential (mV) |
|-------------|--------------------|----------------------|---------------------|
| TNVs 8-30%  | 191.7 ± 15.83      | 0.22 ± 0.02          | -13.53 ± 0.93       |
| TNVs 30-45% | 243.9 ± 13.99      | 0.19 ± 0.02          | -17.5 ± 1.15        |
| TNVs 45-60% | 800.5 ± 66.63      | 0.61 ± 0.21          | -9.65 ± 0.36        |

**Table S2. The yield of TNVs in the different bands, protein concentration (mg) per fresh turmeric (kg), n = 3.**

| Samples     | Yield (mg/kg) |
|-------------|---------------|
| TNVs 8-30%  | 98.61 ± 12.88 |
| TNVs 30-45% | 55.84 ± 7.64  |
| TNVs 45-60% | 9.73 ± 2.33   |

**Table S3. The content of curcuminoids in three different bands using LC-MS, n = 3, mg/kg fresh turmeric.**

| Samples     | Bisdemethoxycurcumin | Demethoxycurcumin | Curcumin     |
|-------------|----------------------|-------------------|--------------|
| TNVs 8-30%  | 5.28 ± 0.78          | 5.00 ± 0.84       | 15.96 ± 3.26 |
| TNVs 30-45% | 2.78 ± 0.92          | 2.63 ± 1.09       | 8.36 ± 2.17  |
| TNVs 45-60% | 0.54 ± 0.19          | 0.55 ± 0.19       | 3.30 ± 0.23  |
